# Supplementary material for: NPY Gene Methylation in Circulating Tumor DNA as an Early Biomarker for Treatment Effect in Metastatic Colorectal Cancer
Source: MDPI journal article supplement (doi:10.3390/cancers14184459), 2022-09-14
Supplement: s1 [file s1]

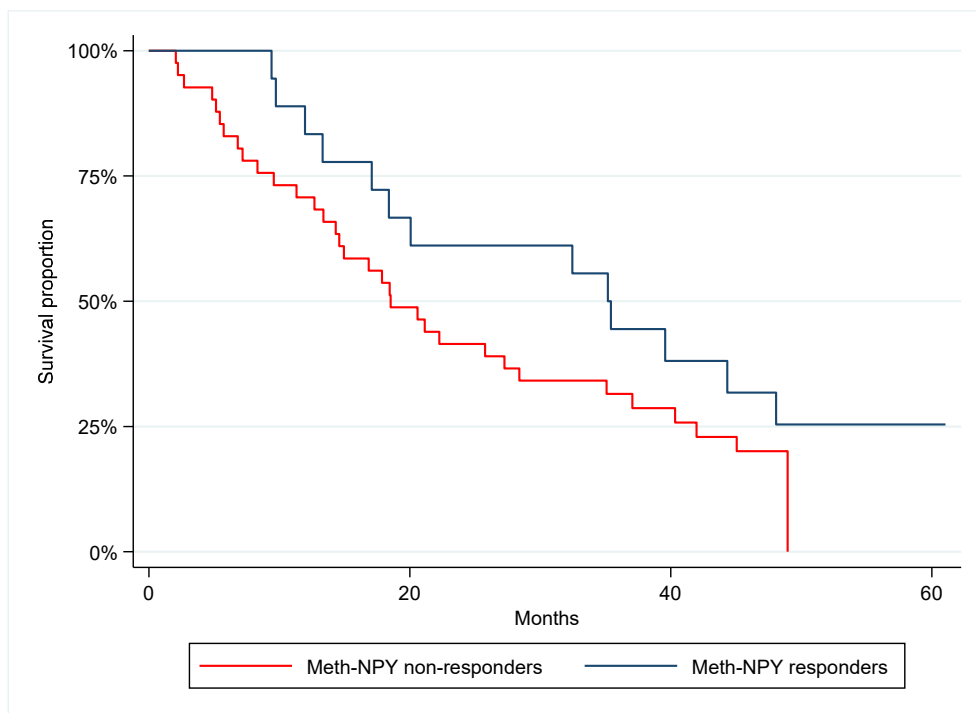

Figure S1: Overall survival (OS) according to meth-NPY response after the first treatment cycle. Median OS was 35.2 vs 18.5 months in responders vs non-responders, respectively ( $p = 0.15$ , HR = 0.62)

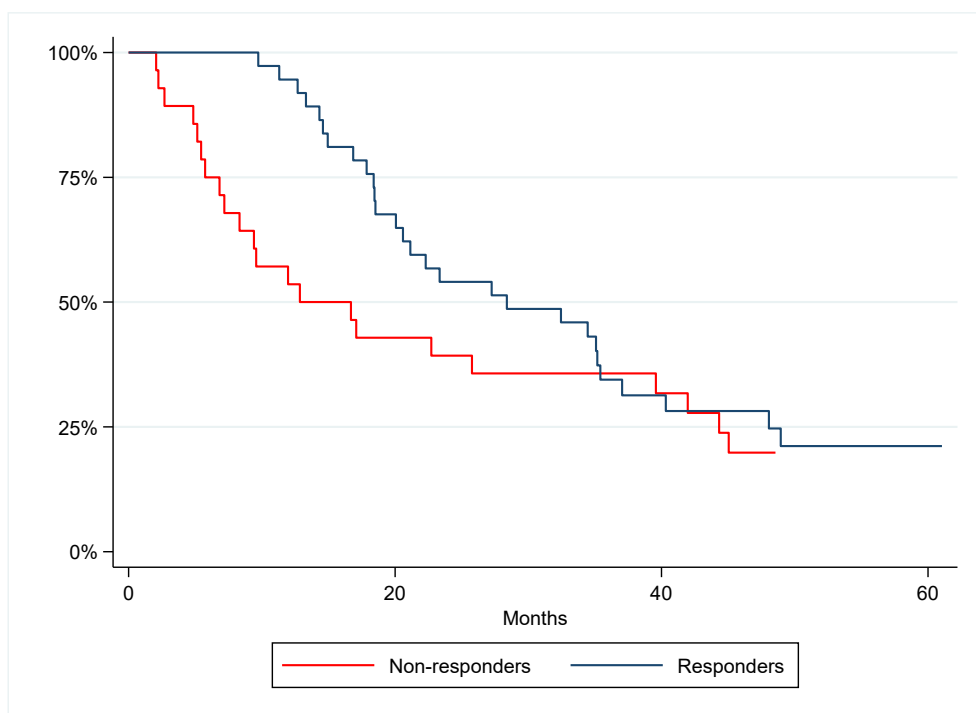

Figure S2: Overall survival (OS) according to RECIST 1.1 response. Median OS was 28.4 vs. 12.9 months in responders vs non-responders, respectively ( $p = 0.15$ , HR = 0.66)
